# Supplementary material for: The Effect of Weather Variables on Mosquito Activity: A Snapshot of the Main Point of Entry of Cyprus
Source: PubMed Central journal article supplement (PMC7068582; doi:10.3390/ijerph17041403), 2020-02-21

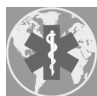

Article

# The effect of weather variables on mosquito activity: A snapshot of the main point of entry of Cyprus

Katerina Drakou <sup>1</sup>, Thessalia Nikolaou <sup>1</sup>, Marlen Vasquez <sup>1,\*</sup>, Dusan Petric <sup>2</sup>, Antonios Michaelakis <sup>3</sup>, Apostolos Kapranas <sup>3</sup>, Athina Papatheodoulou <sup>1</sup> and Maria Koliou <sup>4</sup>

<sup>1</sup> Department of Chemical Engineering, Cyprus University of Technology, Limassol, Cyprus; katerina.drakou@cut.ac.cy (K.D.); ta.nikolaou@edu.cut.ac.cy (T.N.); athina.papatheodoulou@gmail.com (A.P.)

<sup>2</sup> Faculty of Agriculture. Laboratory for Medical and Veterinary Entomology, University of Novi Sad, Novi Sad, Serbia; dusanp@polj.uns.ac.rs (D.P.)

<sup>3</sup> Department of Entomology & Agricultural Zoology, Benaki Phytopathological Institute, Athens, Greece; a.michaelakis@bpi.gr (A.M.); a.kapranas@bpi.gr (A.K.)

<sup>4</sup> Ministry of Health, Nicosia, Cyprus; mkoliou@spidernet.com.cy (M.K.)

\* Correspondence: marlen.vasquez@cut.ac.cy

Received: date; Accepted: date; Published: date

**Supplementary Materials:** The following are available online at [www.mdpi.com/xxx/s1](http://www.mdpi.com/xxx/s1).

**Table S1.** The total number of mosquitoes collected from each trap (May 2017 to June 2018).

| Traps | GPS Coordinates |           | Species            |                     |                    |              |
|-------|-----------------|-----------|--------------------|---------------------|--------------------|--------------|
|       | Latitude        | Longitude | <i>Cx. pipiens</i> | <i>Ae. detritus</i> | <i>Ae. caspius</i> | Unidentified |
| 1     | 33.00667        | 34.65085  | 105                | 58                  | 7                  | 13           |
| 2     | 33.00478        | 34.64871  | 112                | 89                  | 11                 | 18           |
| 3     | 33.00998        | 34.65235  | 80                 | 109                 | 4                  | 7            |
| 4     | 33.00705        | 34.65408  | 105                | 29                  | 6                  | 10           |
| 5     | 33.01823        | 34.65628  | 42                 | 13                  | 2                  | 5            |
| 6     | 33.00457        | 34.65644  | 16                 | 3                   | 1                  | 2            |
| 7     | 33.00273        | 34.64887  | 59                 | 58                  | 6                  | 10           |
| 8     | 33.00003        | 34.64860  | 65                 | 40                  | 5                  | 9            |
| 9     | 33.00116        | 34.65489  | 86                 | 27                  | 5                  | 8            |
| 10    | 33.01335        | 34.65718  | 63                 | 23                  | 4                  | 6            |
| 11    | 33.00904        | 34.65527  | 109                | 50                  | 7                  | 12           |
| 12    | 33.00471        | 34.65157  | 97                 | 39                  | 6                  | 12           |
| 13    | 33.00419        | 34.64555  | 73                 | 128                 | 11                 | 18           |
| 14    | 33.01173        | 34.65502  | 23                 | 5                   | 2                  | 4            |

**Table S2.** Weather data (May 2017 to June 2018).

| Date      | Relative Humidity (%) | Max Temp (C) | Min Temp (C) | Precipitation (mm) |
|-----------|-----------------------|--------------|--------------|--------------------|
| 5/1/2017  | 83                    | 24.7         | 17.3         | 0.0                |
| 5/2/2017  | 76                    | 23.0         | 16.0         | 0.0                |
| 5/3/2017  | 64                    | 23.4         | 14.8         | 0.0                |
| 5/4/2017  | 66                    | 23.3         | 17.2         | 0.0                |
| 5/5/2017  | 76                    | 23.3         | 15.2         | 0.0                |
| 5/6/2017  | 77                    | 24.0         | 16.5         | 0.0                |
| 5/7/2017  | 79                    | 23.9         | 17.7         | 0.0                |
| 5/8/2017  | 82                    | 24.7         | 17.3         | 0.0                |
| 5/9/2017  | 54                    | 28.7         | 18.2         | 0.0                |
| 5/10/2017 | 41                    | 31.2         | 18.1         | 0.0                |
| 5/11/2017 | 72                    | 24.1         | 18.7         | 0.0                |

|           |    |      |      |     |
|-----------|----|------|------|-----|
| 5/12/2017 | 70 | 26.0 | 16.4 | 0.0 |
| 5/13/2017 | 39 | 28.4 | 17.7 | 0.0 |
| 5/14/2017 | 63 | 28.9 | 19.1 | 0.0 |
| 5/15/2017 | 71 | 29.2 | 19.3 | 0.0 |
| 5/16/2017 | 61 | 29.0 | 18.0 | 0.0 |
| 5/17/2017 | 76 | 29.5 | 19.5 | 0.0 |
| 5/18/2017 | 68 | 28.2 | 21.1 | 0.8 |
| 5/19/2017 | 48 | 24.6 | 18.4 | 2.8 |
| 5/20/2017 | 71 | 22.7 | 18.2 | 0.0 |
| 5/21/2017 | 72 | 23.8 | 17.2 | 0.0 |
| 5/22/2017 | 74 | 23.8 | 16.1 | 0.2 |
| 5/23/2017 | 60 | 23.5 | 18.2 | 0.0 |
| 5/24/2017 | 61 | 24.6 | 14.5 | 0.0 |
| 5/25/2017 | 72 | 24.3 | 16.1 | 0.0 |
| 5/26/2017 | 72 | 24.7 | 13.7 | 0.0 |
| 5/27/2017 | 52 | 28.2 | 15.8 | 0.0 |
| 5/28/2017 | 63 | 26.0 | 16.7 | 0.0 |
| 5/29/2017 | 69 | 25.2 | 16.1 | 0.0 |
| 5/30/2017 | 50 | 25.4 | 17.1 | 0.0 |
| 5/31/2017 | 63 | 24.3 | 17.1 | 0.0 |
| 6/1/2017  | 57 | 26.6 | 17.0 | 0.0 |
| 6/2/2017  | 45 | 30.1 | 20.5 | 0.0 |
| 6/3/2017  | 83 | 29.7 | 19.6 | 0.0 |
| 6/4/2017  | 68 | 30.7 | 20.1 | 0.0 |
| 6/5/2017  | 60 | 27.7 | 19.0 | 0.0 |
| 6/6/2017  | 65 | 27.1 | 18.1 | 0.0 |
| 6/7/2017  | 71 | 29.6 | 19.1 | 0.0 |
| 6/8/2017  | 71 | 31.2 | 20.9 | 0.0 |
| 6/9/2017  | 74 | 30.2 | 22.1 | 0.0 |
| 6/10/2017 | 80 | 27.4 | 22.1 | 0.0 |
| 6/11/2017 | 80 | 28.1 | 19.8 | 0.0 |
| 6/12/2017 | 82 | 28.6 | 20.5 | 0.0 |
| 6/13/2017 | 72 | 26.4 | 19.5 | 0.0 |
| 6/14/2017 | 74 | 27.3 | 20.9 | 0.0 |
| 6/15/2017 | 70 | 28.9 | 20.6 | 0.0 |
| 6/16/2017 | 70 | 31.0 | 20.4 | 0.0 |
| 6/17/2017 | 59 | 30.1 | 21.4 | 0.0 |
| 6/18/2017 | 78 | 28.4 | 22.4 | 0.0 |
| 6/19/2017 | 77 | 27.7 | 22.0 | 0.0 |
| 6/20/2017 | 74 | 27.3 | 21.6 | 0.0 |
| 6/21/2017 | 62 | 27.4 | 19.3 | 0.0 |
| 6/22/2017 | 56 | 28.4 | 19.7 | 0.0 |
| 6/23/2017 | 68 | 30.9 | 20.7 | 0.0 |
| 6/24/2017 | 65 | 32.5 | 21.7 | 0.0 |
| 6/25/2017 | 73 | 35.0 | 22.5 | 0.0 |
| 6/26/2017 | 68 | 33.4 | 23.5 | 0.0 |
| 6/27/2017 | 58 | 32.6 | 23.2 | 0.0 |
| 6/28/2017 | 74 | 30.1 | 23.2 | 0.0 |
| 6/29/2017 | 82 | 31.0 | 23.7 | 0.0 |
| 6/30/2017 | 91 | 33.3 | 23.1 | 0.0 |
| 7/1/2017  | 26 | 37.4 | 25.2 | 0.0 |
| 7/2/2017  | 48 | 38.5 | 25.4 | 0.0 |
| 7/3/2017  | 54 | 36.0 | 26.0 | 0.0 |
| 7/4/2017  | 49 | 31.7 | 24.4 | 0.0 |
| 7/5/2017  | 64 | 32.5 | 22.5 | 0.0 |
| 7/6/2017  | 73 | 30.5 | 21.2 | 0.0 |

|           |    |      |      |     |
|-----------|----|------|------|-----|
| 7/7/2017  | 76 | 32.6 | 23.3 | 0.0 |
| 7/8/2017  | 55 | 33.6 | 22.8 | 0.0 |
| 7/9/2017  | 32 | 35.2 | 24.1 | 0.0 |
| 7/10/2017 | 34 | 33.8 | 23.3 | 0.0 |
| 7/11/2017 | 54 | 34.4 | 23.7 | 0.0 |
| 7/12/2017 | 44 | 35.4 | 24.3 | 0.0 |
| 7/13/2017 | 72 | 34.4 | 25.9 | 0.0 |
| 7/14/2017 | 79 | 32.1 | 23.8 | 0.0 |
| 7/15/2017 | 80 | 32.3 | 24.4 | 0.0 |
| 7/16/2017 | 79 | 31.6 | 24.6 | 0.0 |
| 7/17/2017 | 71 | 32.0 | 22.1 | 0.0 |
| 7/18/2017 | 65 | 32.8 | 24.0 | 0.0 |
| 7/19/2017 | 59 | 30.6 | 25.9 | 0.0 |
| 7/20/2017 | 68 | 30.7 | 23.1 | 0.0 |
| 7/21/2017 | 77 | 31.0 | 22.2 | 0.0 |
| 7/22/2017 | 74 | 30.8 | 24.0 | 0.0 |
| 7/23/2017 | 65 | 32.7 | 24.4 | 0.0 |
| 7/24/2017 | 74 | 33.2 | 25.9 | 0.0 |
| 7/25/2017 | 55 | 34.3 | 25.5 | 0.0 |
| 7/26/2017 | 37 | 34.1 | 25.1 | 0.0 |
| 7/27/2017 | 63 | 34.0 | 25.5 | 0.0 |
| 7/28/2017 | 68 | 30.9 | 24.6 | 0.0 |
| 7/29/2017 | 66 | 31.6 | 24.2 | 0.0 |
| 7/30/2017 | 71 | 33.2 | 24.1 | 0.0 |
| 7/31/2017 | 66 | 35.1 | 23.4 | 0.0 |
| 8/1/2017  | 55 | 35.8 | 24.5 | 0.0 |
| 8/2/2017  | 78 | 31.7 | 24.6 | 0.0 |
| 8/3/2017  | 75 | 31.1 | 24.4 | 0.0 |
| 8/4/2017  | 76 | 30.8 | 25.3 | 0.0 |
| 8/5/2017  | 66 | 31.4 | 22.4 | 0.0 |
| 8/6/2017  | 72 | 31.9 | 24.2 | 0.0 |
| 8/7/2017  | 75 | 31.6 | 23.9 | 0.0 |
| 8/8/2017  | 59 | 32.5 | 23.8 | 0.0 |
| 8/9/2017  | 61 | 31.9 | 23.8 | 0.0 |
| 8/10/2017 | 54 | 31.2 | 22.9 | 0.0 |
| 8/11/2017 | 74 | 31.2 | 25.0 | 0.0 |
| 8/12/2017 | 76 | 31.8 | 24.7 | 0.0 |
| 8/13/2017 | 72 | 31.4 | 24.1 | 0.0 |
| 8/14/2017 | 77 | 32.1 | 23.8 | 0.0 |
| 8/15/2017 | 69 | 31.8 | 23.6 | 0.0 |
| 8/16/2017 | 55 | 31.5 | 21.8 | 0.0 |
| 8/17/2017 | 69 | 31.6 | 21.5 | 0.0 |
| 8/18/2017 | 66 | 31.4 | 22.8 | 0.0 |
| 8/19/2017 | 71 | 31.0 | 23.6 | 0.0 |
| 8/20/2017 | 67 | 31.0 | 22.8 | 0.0 |
| 8/21/2017 | 64 | 31.3 | 23.2 | 0.0 |
| 8/22/2017 | 73 | 31.2 | 24.3 | 0.0 |
| 8/23/2017 | 63 | 32.5 | 23.5 | 0.0 |
| 8/24/2017 | 69 | 32.8 | 24.4 | 0.0 |
| 8/25/2017 | 57 | 33.2 | 24.7 | 0.0 |
| 8/26/2017 | 31 | 35.8 | 24.3 | 0.0 |
| 8/27/2017 | 34 | 32.8 | 22.8 | 0.0 |
| 8/28/2017 | 70 | 30.5 | 23.3 | 0.0 |
| 8/29/2017 | 69 | 30.3 | 22.5 | 0.0 |
| 8/30/2017 | 63 | 30.2 | 20.8 | 0.0 |
| 8/31/2017 | 72 | 30.6 | 22.5 | 0.0 |

|            |    |      |      |      |
|------------|----|------|------|------|
| 9/1/2017   | 66 | 31.2 | 23   | 0    |
| 9/2/2017   | 56 | 32.8 | 22.7 | 0    |
| 9/3/2017   | 69 | 33   | 23.1 | 0    |
| 9/4/2017   | 47 | 34.4 | 23.7 | 0    |
| 9/5/2017   | 45 | 31.9 | 22.8 | 0    |
| 9/6/2017   | 70 | 30.1 | 23.4 | 0    |
| 9/7/2017   | 55 | 31.6 | 21.2 | 0    |
| 9/8/2017   | 57 | 32.3 | 20.6 | 0    |
| 9/9/2017   | 56 | 32.5 | 20.6 | 0    |
| 9/10/2017  | 63 | 31   | 21.7 | 0    |
| 9/11/2017  | 58 | 31.8 | 21.2 | 0    |
| 9/12/2017  | 71 | 32.5 | 22.6 | 0    |
| 9/13/2017  | 65 | 32   | 21.1 | 0    |
| 9/14/2017  | 70 | 31.3 | 22   | 0    |
| 9/15/2017  | 76 | 31.4 | 22.9 | 0    |
| 9/16/2017  | 74 | 30.8 | 24.3 | 0    |
| 9/17/2017  | 78 | 29.6 | 23   | 0    |
| 9/18/2017  | 77 | 30   | 23.7 | 0    |
| 9/19/2017  | 54 | 30   | 21.3 | 0    |
| 9/20/2017  | 57 | 29.1 | 22.3 | 0    |
| 9/21/2017  | 76 | 31.1 | 22.4 | 0    |
| 9/22/2017  | 55 | 27.9 | 24.4 | 0    |
| 9/23/2017  | 60 | 29.1 | 20.1 | 0    |
| 9/24/2017  | 62 | 29.2 | 20   | 0    |
| 9/25/2017  | 64 | 28.6 | 20.7 | 0    |
| 9/26/2017  | 70 | 27.8 | 21.9 | 0    |
| 9/27/2017  | 63 | 27.7 | 19.9 | 0    |
| 9/28/2017  | 62 | 28.3 | 19.7 | 0    |
| 9/29/2017  | 65 | 28.8 | 19.7 | 0    |
| 9/30/2017  | 67 | 28.6 | 22.1 | 0    |
| 10/1/2017  | 68 | 27.2 | 19.8 | 0.0  |
| 10/2/2017  | 55 | 29.0 | 19.8 | 0.0  |
| 10/3/2017  | 60 | 28.1 | 20.4 | 0.0  |
| 10/4/2017  | 60 | 28.7 | 20.3 | 0.0  |
| 10/5/2017  | 57 | 28.0 | 18.6 | 0.0  |
| 10/6/2017  | 42 | 28.2 | 17.5 | 0.0  |
| 10/7/2017  | 57 | 28.1 | 18.4 | 0.0  |
| 10/8/2017  | 62 | 27.5 | 18.7 | 7.0  |
| 10/9/2017  | 65 | 24.4 | 20.0 | 0.0  |
| 10/10/2017 | 76 | 25.5 | 17.9 | 0.0  |
| 10/11/2017 | 66 | 25.6 | 16.2 | 0.0  |
| 10/12/2017 | 59 | 27.0 | 16.8 | 0.0  |
| 10/13/2017 | 32 | 27.9 | 16.0 | 0.0  |
| 10/14/2017 | 40 | 26.5 | 15.1 | 0.0  |
| 10/15/2017 | 50 | 26.8 | 16.9 | 0.0  |
| 10/16/2017 | 33 | 27.8 | 18.3 | 0.0  |
| 10/17/2017 | 38 | 28.7 | 17.4 | 0.0  |
| 10/18/2017 | 35 | 29.3 | 16.9 | 0.0  |
| 10/19/2017 | 36 | 28.3 | 15.7 | 0.0  |
| 10/20/2017 | 40 | 28.7 | 16.7 | 0.0  |
| 10/21/2017 | 48 | 26.4 | 14.3 | 0.0  |
| 10/22/2017 | 66 | 25.4 | 17.9 | 0.0  |
| 10/23/2017 | 72 | 25.8 | 17.0 | 0.0  |
| 10/24/2017 | 73 | 25.6 | 17.2 | 3.8  |
| 10/25/2017 | 87 | 25.8 | 19.1 | 22.8 |
| 10/26/2017 | 70 | 26.9 | 16.9 | 0.4  |

|            |    |      |      |      |
|------------|----|------|------|------|
| 10/27/2017 | 63 | 28.0 | 16.1 | 0.0  |
| 10/28/2017 | 72 | 25.7 | 18.6 | 4.8  |
| 10/29/2017 | 67 | 25.2 | 17.7 | 2.2  |
| 10/30/2017 | 65 | 23.6 | 17.0 | 0.0  |
| 10/31/2017 | 64 | 23.6 | 17.6 | 0.0  |
| 11/1/2017  | 70 | 20.1 | 14.3 | 0.0  |
| 11/2/2017  | 65 | 24.0 | 13.6 | 0.0  |
| 11/3/2017  | 66 | 24.2 | 16.2 | 0.0  |
| 11/4/2017  | 71 | 22.3 | 14.1 | 40.2 |
| 11/5/2017  | 88 | 20.9 | 14.5 | 2.0  |
| 11/6/2017  | 75 | 22.8 | 12.7 | 0.0  |
| 11/7/2017  | 72 | 23.1 | 13.8 | 0.0  |
| 11/8/2017  | 51 | 23.6 | 14.5 | 0.0  |
| 11/9/2017  | 57 | 23.4 | 11.0 | 0.0  |
| 11/10/2017 | 76 | 23.3 | 13.0 | 0.0  |
| 11/11/2017 | 70 | 23.4 | 12.4 | 0.0  |
| 11/12/2017 | 67 | 22.8 | 12.7 | 0.0  |
| 11/13/2017 | 62 | 25.5 | 19.5 | 0.0  |
| 11/14/2017 | 78 | 23.5 | 17.2 | 0.0  |
| 11/15/2017 | 76 | 24.4 | 14.2 | 0.0  |
| 11/16/2017 | 60 | 24.1 | 14.2 | 0.0  |
| 11/17/2017 | 53 | 25.2 | 12.6 | 0.0  |
| 11/18/2017 | 45 | 25.5 | 13.6 | 0.0  |
| 11/19/2017 | 79 | 22.4 | 16.1 | 4.2  |
| 11/20/2017 | 91 | 21.4 | 14.6 | 29.0 |
| 11/21/2017 | 45 | 19.3 | 12.7 | 0.2  |
| 11/22/2017 | 60 | 17.9 | 11.2 | 0.0  |
| 11/23/2017 | 66 | 20.4 | 8.1  | 0.0  |
| 11/24/2017 | 69 | 20.6 | 10.0 | 0.0  |
| 11/25/2017 | 78 | 19.5 | 10.9 | 0.0  |
| 11/26/2017 | 59 | 17.5 | 15.9 | 0.0  |
| 11/27/2017 | 59 | 21.7 | 12.6 | 7.4  |
| 11/28/2017 | 68 | 22.1 | 14.5 | 22.4 |
| 11/29/2017 | 88 | 19.3 | 13.5 | 0.4  |
| 11/30/2017 | 59 | 20.4 | 11.6 | 0.0  |
| 12/1/2017  | 71 | 20.7 | 10.8 | 0.0  |
| 12/2/2017  | 76 | 21.6 | 11.3 | 0.0  |
| 12/3/2017  | 55 | 21.4 | 10.1 | 0.0  |
| 12/4/2017  | 66 | 21.0 | 11.0 | 0.0  |
| 12/5/2017  | 56 | 20.4 | 10.1 | 0.6  |
| 12/6/2017  | 83 | 17.7 | 12.3 | 0.2  |
| 12/7/2017  | 51 | 15.8 | 5.6  | 0.0  |
| 12/8/2017  | 56 | 9.3  | 6.0  | 0.0  |
| 12/9/2017  | 89 | 18.4 | 7.2  | 0.0  |
| 12/10/2017 | 73 | 18.7 | 11.0 | 0.0  |
| 12/11/2017 | 73 | 20.0 | 8.3  | 0.0  |
| 12/12/2017 | 61 | 21.5 | 10.1 | 0.0  |
| 12/13/2017 | 54 | 21.4 | 8.8  | 0.0  |
| 12/14/2017 | 58 | 20.3 | 8.6  | 0.0  |
| 12/15/2017 | 79 | 16.9 | 12.3 | 0.0  |
| 12/16/2017 | 78 | 20.0 | 10.3 | 0.2  |
| 12/17/2017 | 83 | 19.9 | 13.2 | 0.0  |
| 12/18/2017 | 87 | 21.5 | 13.3 | 0.0  |
| 12/19/2017 | 85 | 19.9 | 14.9 | 0.0  |
| 12/20/2017 | 76 | 21.1 | 13.2 | 0.0  |
| 12/21/2017 | 74 | 21.2 | 11.9 | 0.0  |

|            |    |      |      |      |
|------------|----|------|------|------|
| 12/22/2017 | 66 | 20.1 | 15.7 | 0.0  |
| 12/23/2017 | 83 | 20.7 | 16.5 | 2.8  |
| 12/24/2017 | 54 | 19.0 | 12.2 | 0.8  |
| 12/25/2017 | 59 | 17.7 | 6.4  | 0.0  |
| 12/26/2017 | 65 | 18.1 | 6.1  | 0.0  |
| 12/27/2017 | 78 | 20.7 | 9.3  | 0.0  |
| 12/28/2017 | 71 | 21.0 | 14.7 | 0.0  |
| 12/29/2017 | 79 | 21.1 | 10.6 | 0.4  |
| 12/30/2017 | 90 | 19.4 | 10.7 | 11.8 |
| 12/31/2017 | 81 | 15.9 | 12.3 | 11.6 |
| 1/1/2018   | 84 | 10.9 | 7.0  | 0.0  |
| 1/2/2018   | 82 | 18.4 | 11.5 | 2.8  |
| 1/3/2018   | 94 | 19.3 | 13.9 | 11.8 |
| 1/4/2018   | 88 | 17.1 | 12.1 | 18.0 |
| 1/5/2018   | 91 | 18.3 | 8.8  | 0.0  |
| 1/6/2018   | 74 | 19.6 | 10.2 | 0.0  |
| 1/7/2018   | 68 | 19.6 | 8.1  | 0.0  |
| 1/8/2018   | 65 | 18.9 | 7.8  | 0.0  |
| 1/9/2018   | 85 | 18.1 | 8.4  | 0.0  |
| 1/10/2018  | 84 | 18.3 | 9.6  | 0.0  |
| 1/11/2018  | 78 | 19.8 | 13.7 | 0.0  |
| 1/12/2018  | 83 | 19.1 | 10.4 | 0.0  |
| 1/13/2018  | 80 | 18.4 | 8.5  | 3.0  |
| 1/14/2018  | 82 | 16.9 | 9.6  | 0.0  |
| 1/15/2018  | 80 | 17.8 | 9.5  | 0.0  |
| 1/16/2018  | 66 | 16.6 | 8.5  | 5.6  |
| 1/17/2018  | 97 | 17.1 | 9.1  | 2.2  |
| 1/18/2018  | 73 | 18.3 | 12.2 | 9.0  |
| 1/19/2018  | 52 | 15.3 | 9.1  | 0.0  |
| 1/20/2018  | 69 | 17.1 | 4.8  | 0.0  |
| 1/21/2018  | 75 | 17.7 | 10.8 | 0.0  |
| 1/22/2018  | 67 | 18.9 | 14.3 | 14.4 |
| 1/23/2018  | 75 | 16.8 | 12.6 | 2.6  |
| 1/24/2018  | 93 | 16.6 | 11.2 | 9.6  |
| 1/25/2018  | 78 | 15.2 | 10.7 | 16.4 |
| 1/26/2018  | 91 | 12.8 | 7.3  | 11.6 |
| 1/27/2018  | 81 | 16.6 | 5.9  | 0.0  |
| 1/28/2018  | 83 | 17.2 | 7.5  | 0.0  |
| 1/29/2018  | 82 | 17.3 | 7.7  | 0.0  |
| 1/30/2018  | 73 | 17.3 | 5.5  | 0.0  |
| 1/31/2018  | 86 | 18.3 | 7.8  | 0.0  |
| 2/1/2018   | 85 | 18.1 | 8.4  | 0.0  |
| 2/2/2018   | 75 | 18.5 | 8.1  | 0.0  |
| 2/3/2018   | 85 | 18.5 | 8.6  | 0.0  |
| 2/4/2018   | 84 | 18.1 | 9.9  | 0.0  |
| 2/5/2018   | 83 | 18.6 | 11.1 | 0.0  |
| 2/6/2018   | 73 | 21.0 | 11.3 | 0.0  |
| 2/7/2018   | 89 | 20.6 | 10.6 | 0.0  |
| 2/8/2018   | 55 | 19.4 | 14.6 | 0.0  |
| 2/9/2018   | 68 | 20.1 | 10.6 | 0.0  |
| 2/10/2018  | 83 | 19.2 | 13.0 | 0.0  |
| 2/11/2018  | 72 | 18.8 | 16.0 | 0.0  |
| 2/12/2018  | 78 | 17.2 | 14.8 | 0.0  |
| 2/13/2018  | 78 | 17.1 | 9.4  | 1.6  |
| 2/14/2018  | 80 | 17.4 | 11.0 | 3.4  |
| 2/15/2018  | 82 | 19.1 | 9.7  | 0.0  |

|           |    |      |      |      |
|-----------|----|------|------|------|
| 2/16/2018 | 72 | 19.4 | 11.5 | 37.0 |
| 2/17/2018 | 96 | 17.2 | 11.1 | 9.4  |
| 2/18/2018 | 42 | 22.3 | 13.3 | 0.0  |
| 2/19/2018 | 70 | 18.4 | 7.6  | 0.0  |
| 2/20/2018 | 81 | 18.0 | 11.7 | 0.4  |
| 2/21/2018 | 86 | 19.4 | 10.0 | 1.2  |
| 2/22/2018 | 77 | 18.3 | 12.1 | 0.0  |
| 2/23/2018 | 78 | 19.5 | 11.3 | 0.0  |
| 2/24/2018 | 70 | 19.5 | 8.7  | 2.4  |
| 2/25/2018 | 74 | 17.6 | 12.2 | 11.2 |
| 2/26/2018 | 96 | 15.8 | 11.8 | 5.6  |
| 2/27/2018 | 74 | 18.5 | 11.2 | 0.2  |
| 2/28/2018 | 80 | 19.4 | 9.5  | 0.0  |
| 3/1/2018  | 86 | 19.8 | 10.9 | 0.0  |
| 3/2/2018  | 67 | 19.2 | 8.9  | 0.0  |
| 3/3/2018  | 71 | 20.1 | 9.3  | 0.0  |
| 3/4/2018  | 79 | 22.4 | 10.8 | 0.0  |
| 3/5/2018  | 77 | 21.9 | 12.3 | 0.0  |
| 3/6/2018  | 82 | 21.7 | 16.6 | 0.0  |
| 3/7/2018  | 84 | 19.6 | 12.8 | 0.0  |
| 3/8/2018  | 86 | 22.5 | 14.5 | 0.0  |
| 3/9/2018  | 72 | 19.7 | 16.2 | 0.0  |
| 3/10/2018 | 67 | 20.4 | 13.1 | 0.0  |
| 3/11/2018 | 77 | 20.3 | 10.6 | 0.0  |
| 3/12/2018 | 81 | 19.5 | 10.3 | 0.0  |
| 3/13/2018 | 79 | 19.1 | 10.9 | 0.0  |
| 3/14/2018 | 82 | 19.8 | 13.1 | 0.0  |
| 3/15/2018 | 75 | 19.0 | 11.4 | 0.0  |
| 3/16/2018 | 60 | 19.6 | 13.6 | 0.0  |
| 3/17/2018 | 60 | 19.9 | 9.9  | 0.0  |
| 3/18/2018 | 76 | 20.8 | 13.2 | 0.0  |
| 3/19/2018 | 65 | 23.7 | 13.7 | 0.0  |
| 3/20/2018 | 84 | 20.1 | 16.0 | 0.0  |
| 3/21/2018 | 83 | 22.6 | 13.0 | 0.0  |
| 3/22/2018 | 83 | 21.4 | 12.2 | 0.0  |
| 3/23/2018 | 55 | 25.7 | 16.6 | 0.0  |
| 3/24/2018 | 64 | 19.7 | 15.0 | 0.2  |
| 3/25/2018 | 69 | 20.6 | 13.4 | 0.0  |
| 3/26/2018 | 62 | 21.7 | 11.1 | 0.0  |
| 3/27/2018 | 49 | 24.2 | 10.0 | 0.0  |
| 3/28/2018 | 48 | 23.2 | 15.3 | 3.8  |
| 3/29/2018 | 68 | 19.9 | 13.5 | 4.4  |
| 3/30/2018 | 69 | 20.2 | 13.4 | 0.0  |
| 3/31/2018 | 73 | 21.1 | 10.2 | 0.0  |
| 4/1/2018  | 68 | 23.1 | 13.0 | 0.0  |
| 4/2/2018  | 71 | 21.6 | 11.4 | 0.0  |
| 4/3/2018  | 69 | 22.4 | 12.5 | 0.0  |
| 4/4/2018  | 42 | 24.3 | 10.9 | 0.0  |
| 4/5/2018  | 36 | 25.7 | 10.2 | 0.0  |
| 4/6/2018  | 35 | 26.1 | 12.1 | 0.0  |
| 4/7/2018  | 67 | 22.8 | 12.1 | 0.0  |
| 4/8/2018  | 66 | 21.6 | 14.9 | 0.0  |
| 4/9/2018  | 71 | 20.7 | 12.7 | 0.0  |
| 4/10/2018 | 71 | 20.8 | 11.9 | 0.0  |
| 4/11/2018 | 65 | 22.2 | 12.5 | 0.0  |
| 4/12/2018 | 83 | 22.4 | 14.9 | 0.0  |

|           |    |      |      |     |
|-----------|----|------|------|-----|
| 4/13/2018 | 81 | 23.9 | 14.3 | 0.0 |
| 4/14/2018 | 69 | 24.1 | 15.4 | 0.0 |
| 4/15/2018 | 85 | 25.6 | 15.9 | 0.0 |
| 4/16/2018 | 30 | 26.4 | 14.8 | 0.0 |
| 4/17/2018 | 32 | 27.4 | 14.8 | 0.0 |
| 4/18/2018 | 23 | 28.3 | 14.9 | 0.0 |
| 4/19/2018 | 45 | 24.9 | 14.8 | 0.0 |
| 4/20/2018 | 76 | 22.7 | 17.9 | 0.0 |
| 4/21/2018 | 64 | 24.1 | 15.4 | 0.0 |
| 4/22/2018 | 28 | 23.3 | 15.3 | 0.0 |
| 4/23/2018 | 37 | 24.8 | 12.0 | 0.0 |
| 4/24/2018 | 54 | 24.7 | 14.1 | 0.0 |
| 4/25/2018 | 30 | 26.1 | 17.5 | 0.0 |
| 4/26/2018 | 51 | 27.1 | 18.1 | 0.0 |
| 4/27/2018 | 60 | 25.1 | 17.5 | 0.0 |
| 4/28/2018 | 58 | 27.0 | 17.4 | 0.0 |
| 4/29/2018 | 78 | 26.9 | 17.5 | 0.0 |
| 4/30/2018 | 81 | 26.4 | 18.1 | 0.0 |
| 5/1/2018  | 46 | 29.5 | 17.2 | 0.0 |
| 5/2/2018  | 48 | 29.1 | 21.4 | 0.0 |
| 5/3/2018  | 44 | 30.0 | 23.6 | 0.0 |
| 5/4/2018  | 46 | 30.5 | 21.9 | 0.0 |
| 5/5/2018  | 79 | 24.8 | 20.8 | 0.0 |
| 5/6/2018  | 75 | 24.8 | 19.3 | 0.0 |
| 5/7/2018  | 72 | 25.7 | 18.3 | 0.0 |
| 5/8/2018  | 59 | 23.9 | 16.9 | 0.0 |
| 5/9/2018  | 69 | 24.7 | 18.3 | 0.0 |
| 5/10/2018 | 77 | 25.7 | 17.2 | 0.0 |
| 5/11/2018 | 51 | 26.5 | 17.4 | 0.0 |
| 5/12/2018 | 75 | 25.2 | 17.0 | 0.0 |
| 5/13/2018 | 59 | 25.0 | 16.4 | 0.0 |
| 5/14/2018 | 73 | 25.4 | 16.1 | 0.0 |
| 5/15/2018 | 64 | 26.2 | 15.8 | 0.0 |
| 5/16/2018 | 77 | 28.5 | 17.9 | 0.0 |
| 5/17/2018 | 57 | 33.1 | 19.2 | 0.0 |
| 5/18/2018 | 22 | 35.4 | 21.0 | 0.0 |
| 5/19/2018 | 28 | 35.6 | 20.9 | 0.0 |
| 5/20/2018 | 27 | 33.7 | 24.4 | 0.0 |
| 5/21/2018 | 55 | 30.0 | 21.7 | 0.0 |
| 5/22/2018 | 56 | 30.9 | 22.9 | 0.0 |
| 5/23/2018 | 55 | 29.1 | 19.6 | 0.0 |
| 5/24/2018 | 71 | 28.9 | 21.3 | 0.0 |
| 5/25/2018 | 69 | 26.4 | 21.0 | 0.0 |
| 5/26/2018 | 69 | 27.0 | 18.8 | 0.0 |
| 5/27/2018 | 69 | 27.7 | 19.3 | 0.0 |
| 5/28/2018 | 69 | 27.3 | 19.3 | 0.0 |
| 5/29/2018 | 61 | 27.3 | 18.9 | 0.0 |
| 5/30/2018 | 69 | 27.3 | 19.1 | 0.0 |
| 5/31/2018 | 70 | 27.3 | 19.3 | 0.2 |
| 6/1/2018  | 78 | 26.6 | 20.0 | 0.2 |
| 6/2/2018  | 62 | 27.4 | 19.7 | 0.0 |
| 6/3/2018  | 70 | 28.5 | 19.8 | 0.0 |
| 6/4/2018  | 68 | 29.0 | 19.8 | 0.0 |
| 6/5/2018  | 67 | 28.0 | 19.8 | 0.0 |
| 6/6/2018  | 48 | 30.5 | 19.5 | 0.0 |
| 6/7/2018  | 53 | 34.6 | 20.2 | 0.0 |



|           |    |      |      |     |
|-----------|----|------|------|-----|
| 6/8/2018  | 35 | 31.6 | 21.6 | 0.0 |
| 6/9/2018  | 62 | 33.2 | 21.4 | 0.0 |
| 6/10/2018 | 76 | 29.5 | 24.0 | 0.0 |
| 6/11/2018 | 67 | 28.6 | 22.0 | 0.6 |
| 6/12/2018 | 75 | 28.0 | 21.6 | 0.2 |
| 6/13/2018 | 76 | 28.9 | 21.0 | 0.0 |
| 6/14/2018 | 75 | 29.2 | 23.4 | 0.0 |
| 6/15/2018 | 70 | 28.2 | 21.1 | 1.2 |
| 6/16/2018 | 85 | 32.5 | 22.0 | 0.0 |
| 6/17/2018 | 66 | 28.5 | 23.7 | 0.0 |
| 6/18/2018 | 70 | 28.3 | 22.6 | 0.0 |
| 6/19/2018 | 67 | 28.6 | 22.2 | 0.0 |
| 6/20/2018 | 66 | 28.8 | 20.2 | 0.0 |
| 6/21/2018 | 71 | 26.1 | 21.2 | 0.0 |
| 6/22/2018 | 69 | 28.9 | 22.5 | 0.0 |
| 6/23/2018 | 72 | 29.3 | 23.0 | 0.0 |
| 6/24/2018 | 74 | 29.0 | 20.9 | 0.0 |
| 6/25/2018 | 73 | 29.9 | 22.0 | 0.0 |
| 6/26/2018 | 61 | 29.9 | 22.3 | 0.0 |
| 6/27/2018 | 68 | 31.0 | 22.0 | 0.0 |
| 6/28/2018 | 68 | 28.7 | 24.4 | 0.0 |
| 6/29/2018 | 65 | 28.8 | 23.1 | 0.0 |
| 6/30/2018 | 66 | 28.9 | 21.9 | 0.0 |

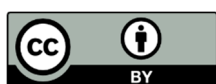

Supplement: ijerph-17-01403-s001.pdf [file ijerph-17-01403-s001.pdf]
